# Supplementary material for: Neurons in the Dorso-Central Division of Zebrafish Pallium Respond to Change in Visual Numerosity
Source: PubMed Central journal article supplement — Cereb Cortex. 2021 Jul 28;32(2):418–28. doi: 10.1093/cercor/bhab218 (PMC8754367; doi:10.1093/cercor/bhab218), 2021-07-28
Supplement: final_supplementary_messina_et_al_manuscript_bhab218.pdf [file final_supplementary_messina_et_al_manuscript_bhab218.pdf]

1 **Supplementary Materials of “Neurons in the dorso-central part of zebrafish pallium**  
2 **encode visual numerosity”**

3

4 Andrea Messina<sup>1,\*</sup>, Davide Potrich<sup>1</sup>, Ilaria Schiona<sup>1</sup>, Valeria Anna Sovrano<sup>1,2</sup>, Scott E.  
5 Fraser<sup>3</sup>, Caroline H. Brennan<sup>4</sup>, Giorgio Vallortigara<sup>1</sup>

6

7 <sup>1</sup> Center for Mind/Brain Sciences, University of Trento, Rovereto, Italy.

8 <sup>2</sup> Department of Psychology and Cognitive Science, University of Trento, Rovereto, Italy.

9 <sup>3</sup> Michelson Center for Convergent Bioscience, University of Southern California, Los  
10 Angeles, USA

11 <sup>4</sup> School of Biological and Chemical Sciences, Queen Mary University London, UK.

12

13

14

15

16

17

18

19

20

21

22

23

24

25

26

27

28

29

30

31

32

33

34

35

36

37

38

39

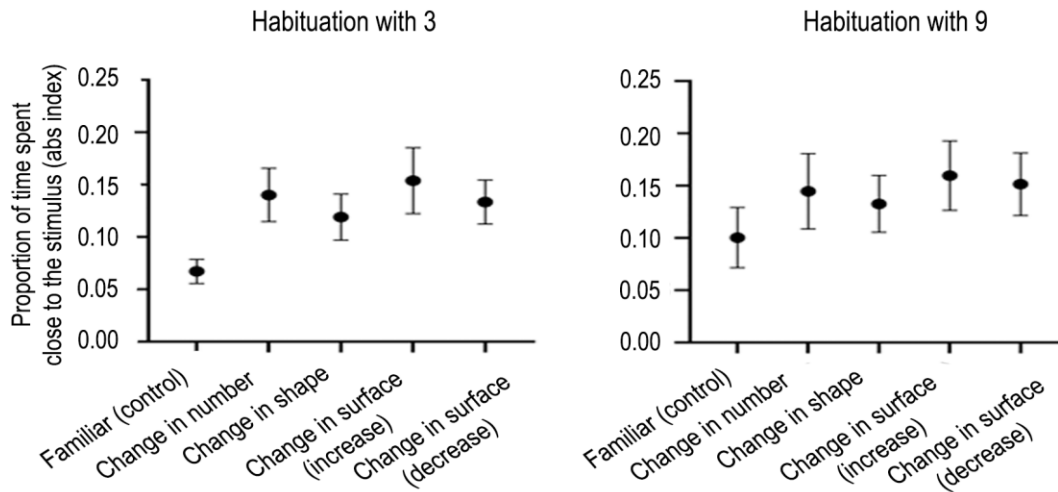

40  
 41  
 42 *Figure S1. Related to Figure 2.* Proportion of time spent near the stimulus during  
 43 dishabituation (comparing the dishabituation trial (*test time*) with the previous habituation  
 44 session (average of the four trials, *habituation time*)) as a function of habituation conditions  
 45 (with 3 or 9 dots) and test conditions [no change (familiar), change in number, change in  
 46 shape, change in surface area (increase), change in surface area (decrease)].

47

48

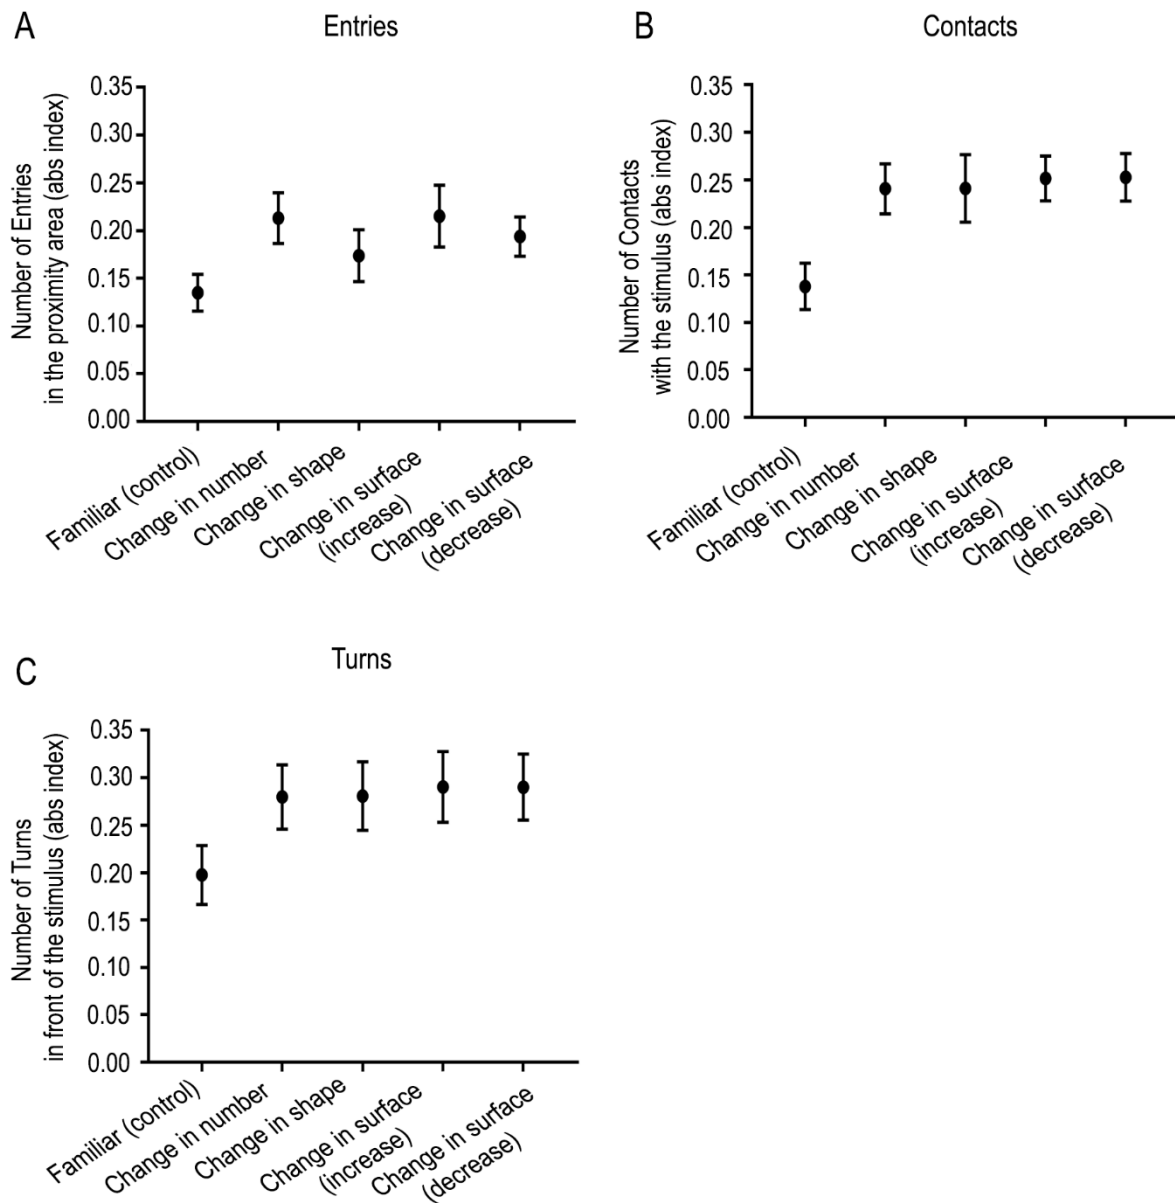

49  
 50 *Figure S2. Related to Figure 2. Behavioral measures concerning the proportions of “entries*  
 51 *in the proximity area” (A), “contacts with the stimulus”, and (B) “turns in front of the stimulus*  
 52 *in the proximity area” (C) for the different testing conditions. Group means with SEM are*  
 53 *shown. The ANOVA revealed a significant heterogeneity among conditions in the proportion*  
 54 *of contacts with the stimulus ( $F(4,233) = 3.214, p = 0.014$ ; LSD post hoc tests: Familiar vs.*  
 55 *Change in number  $p = 0.008$ ; Familiar vs. Change in shape  $p = 0.008$ ; Familiar vs. Change*  
 56 *in area (increase)  $p = 0.004$ ; Familiar vs. Change in area (decrease)  $p = 0.003$ ). There was*  
 57 *no overall heterogeneity in the proportion of entries in the proximity area ( $F(4,240) = 1.662,$*

58  $p = 0.160$ ) and in the proportion of turns in front of the stimulus ( $F(4,232) = 1.320, p = 0.263$ ).

59 However, when comparing the four test conditions involving a change with the control

60 condition (no change), a significant effect was observed also for entries in proximity area

61 ( $F(1,246) = 5.033, p = 0.026$ ) and turns in front of the stimulus ( $F(1,238) = 5.268, p = 0.023$ ).

62

63

64

65

66

67

68

69

70

71

72

73

74

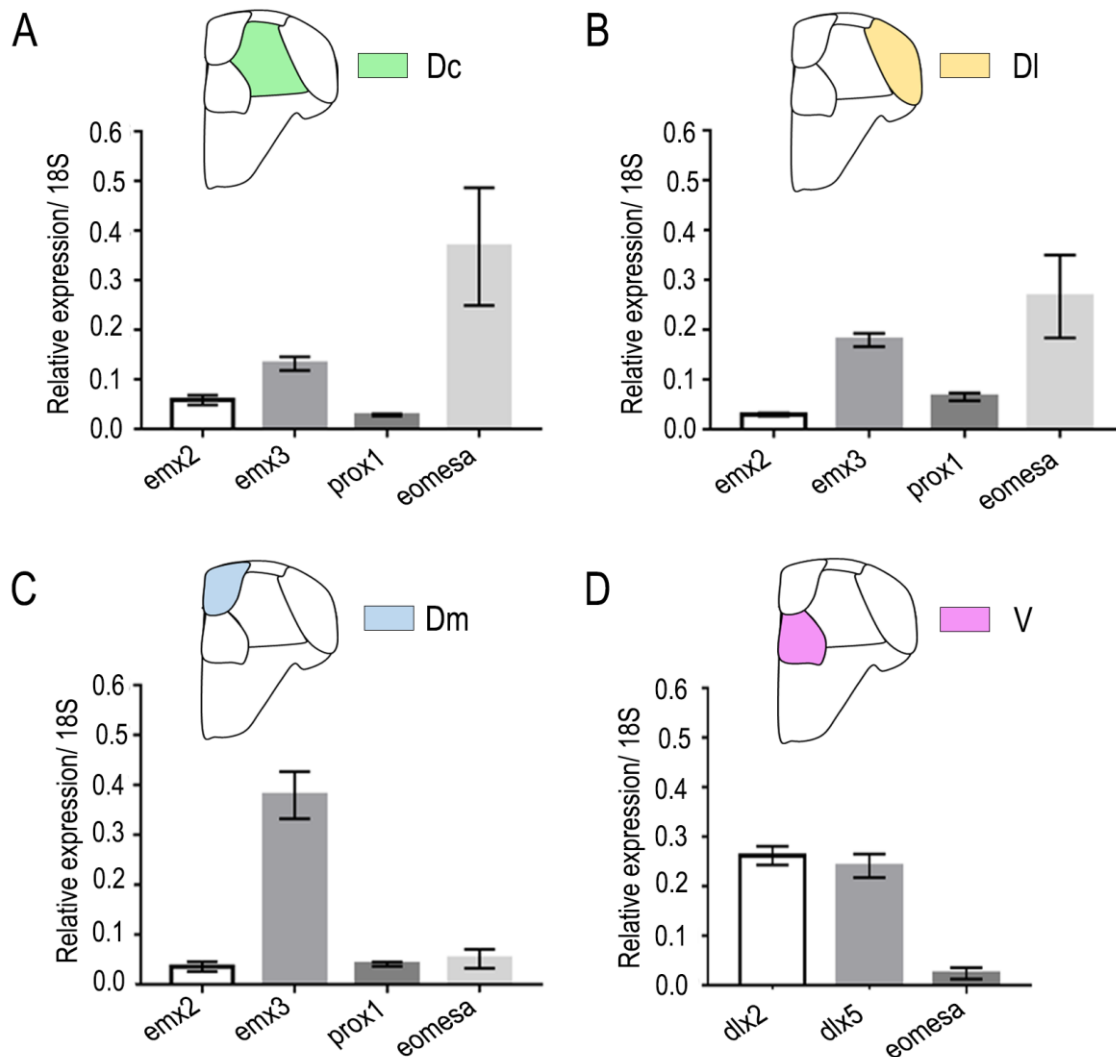

75

76 *Figure S3. Related to Figure 3. Molecular signature of regional markers. qPCR results for the*  
 77 *relative expression of molecular markers in the central part of area dorsalis telencephali (A), in the*  
 78 *lateral part of area dorsalis telencephali (B), in the medial part of area dorsalis telencephali (C),*  
 79 *and in the ventral subpallium (D) in the different test conditions. Group means with SEM are*  
 80 *shown. ANOVA revealed a significant main effect of the nuclei for each gene analysed : emx2 (F(2,*  
 81 *192) = 3.543, p = 0.034; LSD post hoc tests: Dc vs. DI p = 0.015; Dc vs. Dm p = 0.043); emx3,*  
 82 *(F(2, 192) = 19.947, p = 0.0001; LSD post hoc tests: Dc vs. Dm p = 0.0001); DI vs. Dm p =*  
 83 *0.0001); prox1, (F(2, 192) = 12.849, p = 0.0001: LSD post hoc tests: Dc vs. DI p = 0.0001; DI vs.*  
 84 *Dm p = 0.001); eomesa (F(2, 192) = 3.669, p = 0.027; LSD post hoc tests; Dc vs. Dm p = 0.009).*

85

86

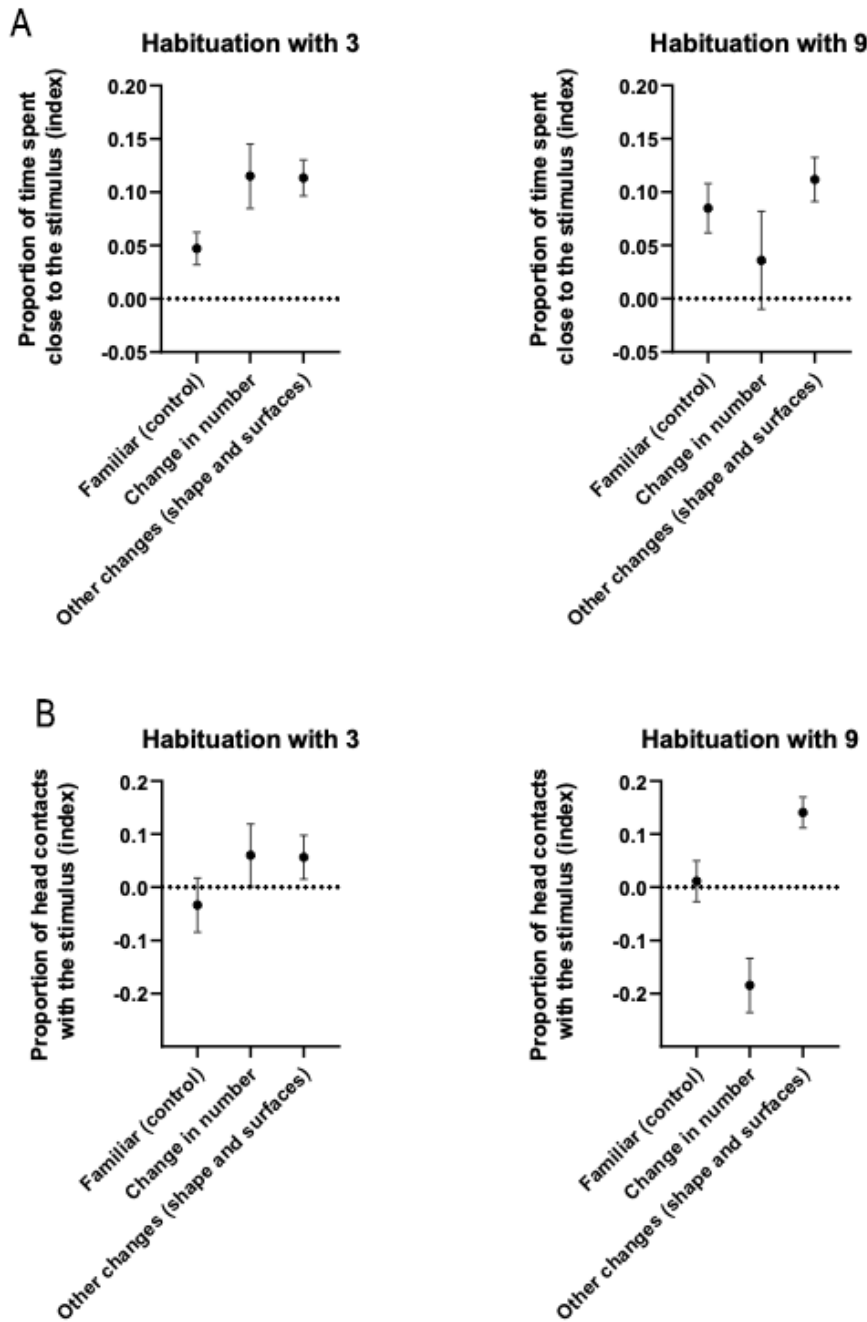

87

88 *Figure S4.* Relative index of the proportion of time spent near the stimulus (A) and of  
 89 stimulus contacts (B) at test (dishabituation) as a function of habituation conditions (with 3  
 90 or 9 dots). As can be seen, change in number were associated with significant interactions  
 91 with habituation conditions (see text for statistical analyses), with increase or decrease of  
 92 behavioural responses depending on increase or decrease of numerosity, whereas this  
 93 was not observed with the non-numerical changes (in shape and surface areas, here  
 94 lumped together because there was no difference, see text for statistical analyses].

95

96 *Table S1.* Overall analyses of variance (ANOVA) for *c-fos* and for *egr-1* in qPCR, with  
 97 habituation (habituation with 3 dots, habituation with 9 dots) and type of test (familiar,  
 98 number, shape, surface area increase, surface area decrease) as between-subject factors,  
 99 and telencephalic nuclei (Dc, Dl, Dm, V) as a within-subject factor.

|       |                                                       |                          |          |
|-------|-------------------------------------------------------|--------------------------|----------|
| ANOVA |                                                       |                          |          |
| c-fos | Main effect of Telencephalic Nuclei                   | F(2.55,178.880)=0.712    | p=0.524  |
|       | Main effect of Habituation                            | F(1,70)=1.270            | p=0.264  |
|       | Main effect of Test                                   | F(4,70)=5.646            | p=0.001  |
|       | Telencephalic Nuclei x Test interaction               | F(10.222,178.880)=1.444  | P=0.163  |
|       | Habituation x Test interaction                        | F(4,70)=0.437            | p=0.781  |
|       | Telencephalic Nuclei x Habituation interaction        | F(2.555,178.880)=2.918   | p=0.044  |
|       | Telencephalic Nuclei x Test x Habituation interaction | F(10.222,178.880)=1.324  | p=0.219  |
|       |                                                       |                          |          |
| egr-1 | Main effect of Telencephalic Nuclei                   | F(2.705,189.3199)=22.083 | p=0.0001 |
|       | Main effect of Habituation                            | F(1,70)=1.241            | p=0.269  |
|       | Main effect of Test                                   | F(4,70)=15.217           | p=0.0001 |
|       | Telencephalic Nuclei x Test interaction               | F(10.818,189.319)=2.307  | p=0.012  |
|       | Habituation x Test interaction                        | F(4,70)=0.975            | p=0.427  |
|       | Telencephalic Nuclei x Habituation interaction        | F(2.705,189.319)=0.098   | p=0.950  |
|       | Telencephalic Nuclei x Test x Habituation interaction | F(10.818,189.319)=0.853  | p=0.585  |

100

101

102

103

104

105

106

107

108

109

110

111 *Table S2. Analyses of variance (ANOVA) for c-fos and for egr-1 mRNA expression level in*  
 112 *qPCR for Dc, with habituation (habituation with 3 dots, habituation with 9 dots) and type of*  
 113 *test (familiar, number, shape, surface area increase, surface area decrease) as between-*  
 114 *subject factors.*

115

|       |                                |                |          |
|-------|--------------------------------|----------------|----------|
| Dc    |                                |                |          |
| c-fos | Main effect of Habituation     | F(1,70)=0.175  | p=0.677  |
|       | Main effect of Test            | F(4,70)=9.484  | P=0.0001 |
|       | Habituation x Test interaction | F(4,70)=3.838  | p=0.007  |
|       |                                |                |          |
| egr-1 | Main effect of Habituation     | F(1,70)=1.156  | p=0.286  |
|       | Main effect of Test            | F(4,70)=19.382 | p=0.0001 |
|       | Habituation x Test interaction | F(4,70)=2.306  | p=0.067  |

116

117

118

119

120

121

122

123

124

125

126

127

128

129

130

131

132

133



134 *Table S3. Analyses of variance (ANOVA) for c-fos and for egr-1 mRNA expression level in*  
 135 *qPCR for DI, with habituation (habituation with 3 dots, habituation with 9 dots) and type of*  
 136 *test (familiar, number, shape, surface area increase, surface area decrease) as between-*  
 137 *subject factors.*

138

|       |                                |               |          |
|-------|--------------------------------|---------------|----------|
| DI    |                                |               |          |
| c-fos | Main effect of Habituation     | F(1,70)=0.35  | p=0.852  |
|       | Main effect of Test            | F(4,70)=1.917 | p=0.117  |
|       | Habituation x Test interaction | F(4,70)=0.209 | p=0.933  |
|       |                                |               |          |
| egr-1 | Main effect of Habituation     | F(1,70)=0.168 | p=0.683  |
|       | Main effect of Test            | F(4,70)=6.531 | p=0.0001 |
|       | Habituation x Test interaction | F(4,70)=0.406 | p=0.804  |

139

140

141

142

143

144

145

146

147

148

149

150

151

152

153

154

155

156 *Table S4.* Analyses of variance (ANOVA) for *c-fos* and for *egr-1* mRNA expression level in  
 157 qPCR for Dm, with habituation (habituation with 3 dots, habituation with 9 dots) and type of  
 158 test (familiar, number, shape, surface area increase, surface area decrease) as between-  
 159 subject factors.

160

|       |                                |               |         |
|-------|--------------------------------|---------------|---------|
| Dm    |                                |               |         |
| c-fos | Main effect of Habituation     | F(1,70)=0.004 | p=0.949 |
|       | Main effect of Test            | F(4,70)=0.939 | p=0.447 |
|       | Habituation x Test interaction | F(4,70)=0.142 | p=0.966 |
|       |                                |               |         |
| egr-1 | Main effect of Habituation     | F(1,70)=0.189 | p=0.665 |
|       | Main effect of Test            | F(4,70)=0.938 | p=0.447 |
|       | Habituation x Test interaction | F(4,70)=0.578 | p=0.680 |

161

162

163

164

165

166

167

168

169

170

171

172

173

174

175

176

177

178 *Table S5. Analyses of variance (ANOVA) for c-fos and for egr-1 mRNA expression level in*  
 179 *qPCR for V, with habituation (habituation with 3 dots, habituation with 9 dots) and type of*  
 180 *test (familiar, number, shape, surface area increase, surface area decrease) as between-*  
 181 *subject factors*

182

|       |                                |                |         |
|-------|--------------------------------|----------------|---------|
| V     |                                |                |         |
| c-fos | Main effect of Habituation     | F(1,70)=10.052 | p=0.002 |
|       | Main effect of Test            | F(4,70)=3.159  | p=0.019 |
|       | Habituation x Test interaction | F(4,70)=0.282  | p=0.889 |
|       |                                |                |         |
| egr-1 | Main effect of Habituation     | F(1,70)=0.882  | p=0.351 |
|       | Main effect of Test            | F(4,70)=5.487  | p=0.001 |
|       | Habituation x Test interaction | F(4,70)=0.858  | p=0.493 |

183
